# Supplementary material
Source: PubMed Central journal article supplement (PMC2823445)
Supplement: supp_C109.081943_SUPPLEMENTAL_DATA.pdf [file supp_C109.081943_SUPPLEMENTAL_DATA.pdf]

Supplementary Figure 1. TPC3 pseudogene sequences in primates. Multiple sequence alignment of coding nucleotide sequences of cow *TPC3* (BtaTPC3) and genomic sequences from human (*Hsa*), chimpanzee (*Ptr*) and monkey (*Mmu*). Nucleotide deletions in primate sequences are marked with asterisks and stop codons are indicated with a filled circle. The genomic sequences were derived from the following unique trace identifiers: TI1571518716, TI232317170, TI222576964 and TI1008067773 (human); TI368718204, TI235691386, TI441856022 and TI229241163 (chimpanzee); TI541405745, TI541924217 and TI460077731 (monkey).

Supplementary Figure 2. Sea urchin TPCs. Multiple sequence alignment of the deduced amino acid sequences of *TPC* genes from the sea urchin (SpTPC1-3) and human (HsTPC1 and HsTPC2). Position of the two putative pores is highlighted in red.

# Supplemental Fig. S1

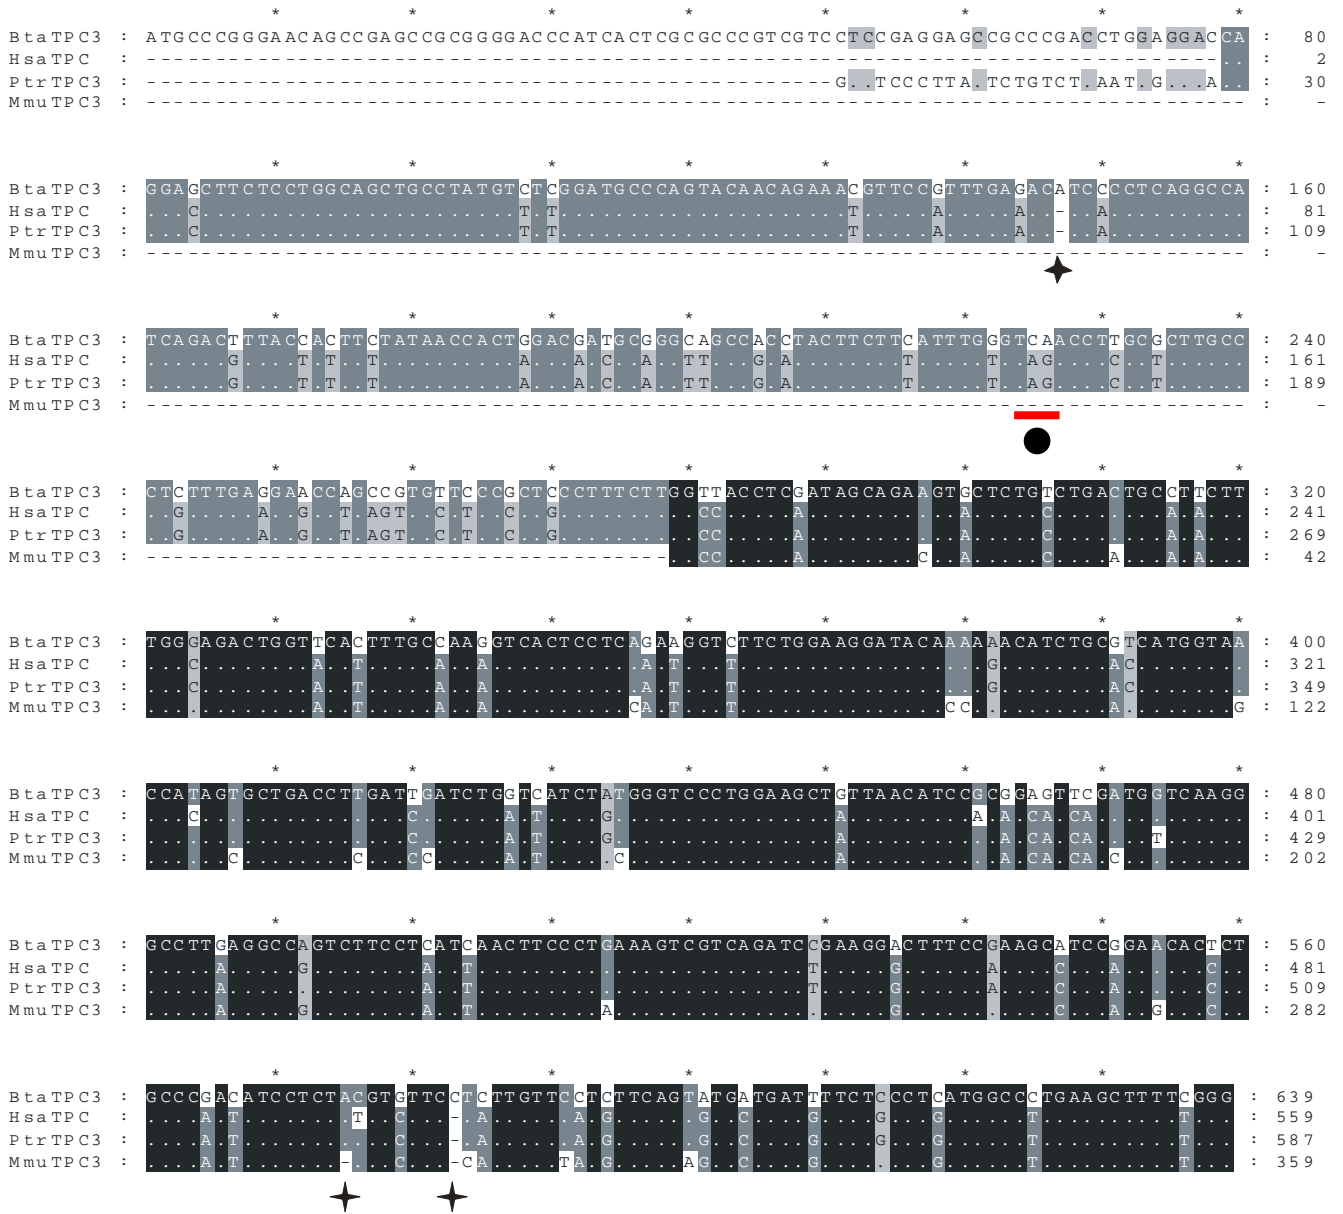

# Supplemental Fig. S2

SpTPC1 1 -----MADLEDDLNRVSVLELESPIILADQQSCQSFRTVRSVYLNNDSSVAISPGFSLRQTSSLSVLPALGNSQDWEINLYRE  
HsTPC1 1 -----MAVSLDDDDVPLILTLDEGGSPALPLAPNSGLGQEEPLSKNGGSYAIHDSQAPSLSSGGESSPSSPAHNWEMNYQE  
SpTPC2 1 -----MCDYYEYESDDNDQKQPIHRKVPPIYGRDRERSDSSTYLIGSSASANALMNFSDSHCDPKALLQAVVEVE  
HsTPC2 1 -----MAEPQAESEPLLGGAR--GGGGDWPAGLITTYRSIQVGPAAARWDLCID-----QAVVEIE  
SpTPC3 1 MEGPKDYVDSYMPKSKSKSSNTKISDNTKTSDNKLDNTTSLDKITTFSESSPVISSSLRSRDKELTPVIEFIEMEVNAVANG

SpTPC1 74 AATYLQEGENNDR-----FDTHPRNQ-----DAPAYVMVHNFYFYIIDLAAAMVPLLAIVVEPAVDALQL  
HsTPC1 74 AATYLQEGENNDK-----FFTHPKDA-----KALAAYLFAHNHLEFYLDELATALLLLLSCBAPAVPALRL  
SpTPC2 74 DAVKFRSFKHKIDPFSLWYRVRVYSRP-----IQWTLYLATFTILVLAFFEPSSLETGSSSDPRYRGDRTHA  
HsTPC2 55 DAIQYRSINHRVDASSMWLYRRYYSNV-----CQRTLSFTIFLILFLAFIETPSSLTS--TADVRYRAPWEP  
SpTPC3 81 RAKAFSVSLHPKIKALDLFLAATYIKDAKYGRKFKFKTSEKHRYVYHLYNMPISFSWLYLFLMLNLSLAFVEEPAVGNLHI

SpTPC1 136 QPIIHASLEIFGLTIVIALGLGLKMRWMLKSFVKHHRKRTLLKAEFLIVMYSALVVLVVRQQ----SHFRVTRALRPIFLID  
HsTPC1 136 GLYVHATLELFALVVVVFELCMKLRWLGLHFTIRHKRTMVKTSVLLVQVFEAIVVLVVRQM----SHVRVTRALRCLFLVD  
SpTPC2 142 PCGVTEGIEFVCLLIFLYDVCTKIYILGFSELKSKWLVAYLVVMAFSLIDWLVTFVFCV---ELYRIRRRFLRPFELIQ  
HsTPC2 121 PCGLTESVEVLCCLVFAADLSVKGYLFWAHFQKNLWLLGYLVVLSLVDWTVSLSLVCH---EPLRIRRRLLRPFELIQ  
SpTPC3 161 PYWASMLLETSCLVYETLRLLLSHSYCAAGWFRDRMKNVASITVILITVDMVMFTMMYELGAKDKAVRWSRPLRPVLMVT

SpTPC1 212 CHYCGGVRRLVLRQIIFQSLPPIEMFLFLLAYFMLIFFSILGFYIFVN-----VE  
HsTPC1 212 CRYCGGVRRLNRQIFQSLPPFMDILLLLFFMIIIFAILCFYLFSP-----NP  
SpTPC2 219 N--SQLMKKTIVRSIKNTMPKVASVILLLLTHIYFFTFMGMLLEPRPDGDLKPSVLHNKTSNQTSLIVNDTITVDSRIFQE  
HsTPC2 198 N--SSMMKKTILKCIKRWLPEMASVGLLLATHLCLFTMGMLLEAG-----GKQDDGQD-----RE  
SpTPC3 241 FAEMKIVRLAFSNIKKTILLELINVLLIFLVIALFALLGRELEFGNDN-----LKKVDE

SpTPC1 259 DDIYFQITLQDSFVNLFVLMTTANFPDVMMPAYNHNPNWSAIFFIVFLVLELFFLINLLAVVYDTFTGIEKKKFKKLTLMH  
HsTPC1 259 SDPYFSTLENSIVSLFVLLTTANFPDVMMSYSRNPNWSCVFFIVYLSIELYFTMNLLLAVVDTFNDIEKFKKSLFLHK  
SpTPC2 297 GMQHFASIGESFMSLLVLLTTANPDVMPAYQNRFYALYFIFLGLIGLYLFFNMLTAVIYNEFRGYLITSMQSSHFRR  
HsTPC2 251 RLTYFQNLPESLTSLVLLTTANPDVMPAYSKNRAYAIFFIVFTVIGSLFLMNLTAIYISQFGRYLMKSLQTSLFRR  
SpTPC3 294 VSPYFTDFWEIHWDLVVLVTTANSPDIMPAYDFNPWYMLYFITYIFICLYIFMSIFLAVIYKNYRKHLKNEVQKSVFNK

SpTPC1 339 QLATSKAFRLLCSRHPGKATFAHFEG-----LLKYAPNKSERDVLITPKSLNTSGSGKLDLQEFHNIFEVSRKWKSKQ  
HsTPC1 339 RTAIQHAMRLLISQRRPAGISYRQFEG-----LMRFYKPRMSARERYLTFKALNQNNIPLLSLKDFYDIYEAALKWKAK  
SpTPC2 377 RLGFQAAFEMLRAQITVNGSIERCTVSVSVKSVLQASIPKRAKRTLTEL DGNIGGVIISSEFQGLFDCLDHQDDED  
HsTPC2 331 RLGTRAAFEVLSMVGEGGAFPPQAVGVKPNLLQVQLQKVDSSSHKQAMKVKRSYGSVLLSABEFQKLENELDRSVVKE  
SpTPC3 374 RRKCLASANDILKEWEG--GRFLLSNGR--WKEMMGVAPKLNRAHVRLLRVLDQDGVNFINKRTEMKVVDILNVPVIVQV

SpTPC1 414 REERLW--EESLLSPLDKLFRLLHKMVSSRIFEGIVYTVIAINGITVFIKTIISKHTFPEQNVAVAWYDWFVVGFCYMEA  
HsTPC1 414 KNREHW--EDELPRALLIFKGNILVKSFAFOYFYLVAANGVWILVETFMKKGNGFFSKH--VPWSYLVFLTIYCVEL  
SpTPC2 457 EIPGPR--LITRPRKRLQSCIVHRRFFG---YCGTAVAVNIVFISIEISTQYDKS--LYHDDSELTKFNIVFIIYYCVEQ  
HsTPC2 411 HPPRPE--YQS--PFLQSAQFLFGHYFYD---YLGNIILANVSIICVFLVLDADVLPARDDFELGILNCVFIYVYLEM  
SpTPC3 450 DKQKSFSERRCPCTCYNSKASLFRKVINHRHYFTYVFDLLIILN-----AFFVVGKLDDEGEPEYFLALEFVEI

SpTPC1 492 FLKILGFGPRGYFILGWNLDFDIITVTAFCVVTOAADKN-----FQYIILLRPILRLRIFKINKR  
HsTPC1 491 FLKVAGLGPVEYLSGWNLFDFSVTVFAFLGLLALANMEP-----FYFIVVLRPQLLRFLKLER  
SpTPC2 531 VLKFWALGKWKCFKYSVTNLLDALEFATVAVLVAQIILYLYME--GSRLYPDDSVGFVMDLVRIINLITFRLERIITHFNT  
HsTPC2 485 LLKVFALGLRGLYSYPSNVFDCLLITVVLVLEISTLAVYRPLPHGWRPEMVGLLSLWDMTRMNMMLIVFRLERIIPSMKL  
SpTPC3 516 ALKMYALGFYKFFRSFVNVVDFLWIGAAVVTIIEAILDSN-----ETETTLDILLLRVLRVRIINNIER

SpTPC1 553 YRDVFGTIELTPRMAVGVCLLIYYFYVAIVGMEFFAESQ--LENCRRNDTFAYY-----SNSSRYKDYFYLNNF  
HsTPC1 553 YRNVLDTMPELLPRMASLGLTLIFYYSFVAIVGMEFFCGIV--FPNCCNISTVADAYRWRNHTVGNRTVVEEGYYLNNF  
SpTPC2 608 MAVVSTMLDLIRNRAFIGILVVIYVFAILGMVVRGRKS--PQPPNNDITQLP-----MCGSYRQLNYANNF  
HsTPC2 565 MAVVASTVGLVQNMRAFGGILVVVYVFAIIGINLFRCVI--VALPGNSLAPANGS-----APCGSEQLEYVANNF  
SpTPC3 583 FHVIVATVMNIGPSIVTFGAILFVVVYFVAIVGMGLYGCKVNYGYEIDGADLTDDELYCGNPLLRGSDYRVDHYCNMNF

SpTPC1 623 DDIIILRSVVTLEFELTVVNNWHIIMGGYASAVSEWSRYFFFLFYLSMMVVT-IVVAFILEAFLEFRIQYHQKAEQTDENQV  
HsTPC1 631 DNIILNSFVTLEFELTVVNNWYIIMEGVTQSSHWSRYFMTFYIVTMVVT-IIVAFILEAFVFMNYSR----KNQDSEV  
SpTPC2 677 DDFASAIIVLWDMVNNWHVLEAYSKTASQWSQIYFIAWYFTSVLVCLNVFTAILLENFITSWDRSQ-----  
HsTPC2 637 DDFAAALVTLNMLVNNWQVFLDAYRRYSGPWSKIYFVLLVWLVSSVIVVNLFLAILLENFTHKWD-----  
SpTPC3 663 NNILKAFIILLIELMVVNQWHVISEGYVIVINKASRIYFLFHFISVVVVIINIFIAFILEVFMVEYSLSK-----

SpTPC1 702 DGESEIVEVMSLTAVEVDFFPRAR-ADVNLISLLGLTLERGG-----IIAYRGRQRTRADLSKTMVAEEVKEWIK  
HsTPC1 706 DGG--ITLEKEISKEELVAVLELYREARGASSDVRLELLETLSQEMERYQHSMVFLGRSRTKSDLSLKMYSQEBEIQEWYEE  
SpTPC2 746 -----KRQQSLEEGNRPTAYLMSVHTMFRGD-----LQEPTESELLDETYKHPHIQNLRF  
HsTPC2 703 -----PRSHLQPLAGTPEATYQMTVELLEFRDI-----LEEPGEDELTERLSCHPHLWLCR-  
SpTPC3 732 -----TEYSALEKVVEDLGLSDKVVDDLEBAS-----RRRKPKPDKELVKEKMEQHPENPDDN

SpTPC1 776 ADREHHELDQNFRVQMSRNTLLTELGDSTASTPTDGDGATPTGSPLVQPSTATAMPARVNPFLGRPEPTLTSNHHTPTKG  
HsTPC1 784 HAREQEQQRQ-----LSSSAAPAAQQ-----PPGS--RQRQTVT-----  
SpTPC2 797 -----  
HsTPC2 -----  
SpTPC3 785 IKFRLGKRRKAMQVTLQNMFEGLDDEDICPEEIDDVDDMPETDITPFPPLSLDNIA-----

SpTPC1 856 EPSINRVEGHDEEEDDDDDIIGDEL  
HsTPC1 -----  
SpTPC2 -----  
HsTPC2 -----  
SpTPC3 -----
